# Supplementary material
Source: publisher figshare collection journal article supplement (https://tandf.figshare.com/ndownloader/files/34093164)
Supplement: Supplementary file 1 [file 34093164]

Supplementary Table 2. Patient characteristics in 8 patients who developed MCRPC after initial ADT plus docetaxel

| Age, years | Gleason score | PSA | Metastases | Nr. of cycles | Date | Time to MCRPC, mo Survival, mo | |  | OOS |  |
| --- | --- | --- | --- | --- | --- | --- | --- | --- | --- | --- |
| 71 | 5+4 | 28 | Bone <5 | 6 | Mar 15 | 32 | 41 | |  |  |
| 61 | 4+3 | 196 | Bone >10,  nodes | 6 | Jun 15 | 7 | 12 | | 12 |  |
| 63 | 4+4 | 102 | Nodes | 6 | Jun 15 | 33 | 48 | |  |  |
| 67 | 4+5 | 3500 | Bone >10,  visceral | 6 | Nov 15 | 22 | 56 | |  |  |
| 74 | 4+5 | 23 | Bone <5,  nodes | 6 | Dec 17 | 16 | 25 | |  |  |
| 59 | 5+4 | 239 | Bone >10, nodes | 5 | Nov 18 | 9 | 24 | |  |  |
| 75 | 4+3 | 159 | Bone >10 | 3 | Apr 19 | 19 | Alive | |  |  |
| 75 | 4+5 | 45 | Bone >10,  visceral | 3 | Jan 20 | 8 | 14 | |  |  |

ADT: androgen deprivation treatment, PSA: prostate specific antigen, MCRPC: metastatic castration-resistant prostate cancer
